# Supplementary material
Source: publisher figshare collection journal article supplement (https://diabetesjournals.figshare.com/ndownloader/files/31656278)
Supplement: Supplementary file 1 [file 31656278]

## **Supplemental material**

**Appendix 1.** An overview of individuals and their transitions during the study period by using multi-state models stratified by sex

**Appendix 2.** Descriptive comparison of individuals with and without a psychiatric disorder ( $n = 5,005,612$ )

**Appendix 3.** Median and interquartile range of age of type 2 diabetes onset for individuals with and without a psychiatric disorder developing type 2 diabetes during the study period ( $N = 334,739$ )

**Appendix 1.** An overview of individuals and their transitions during the study period by using multi-state models stratified by sex

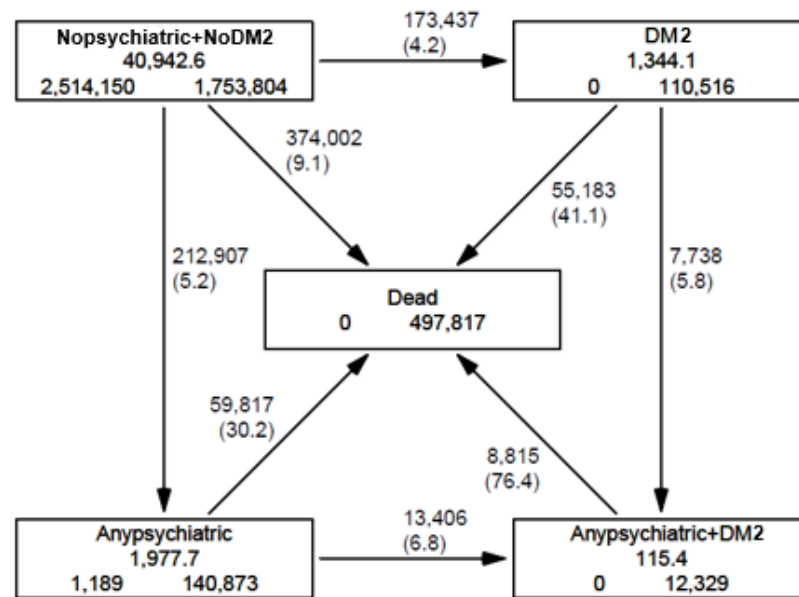

This multi-state model contains all men within the study sample

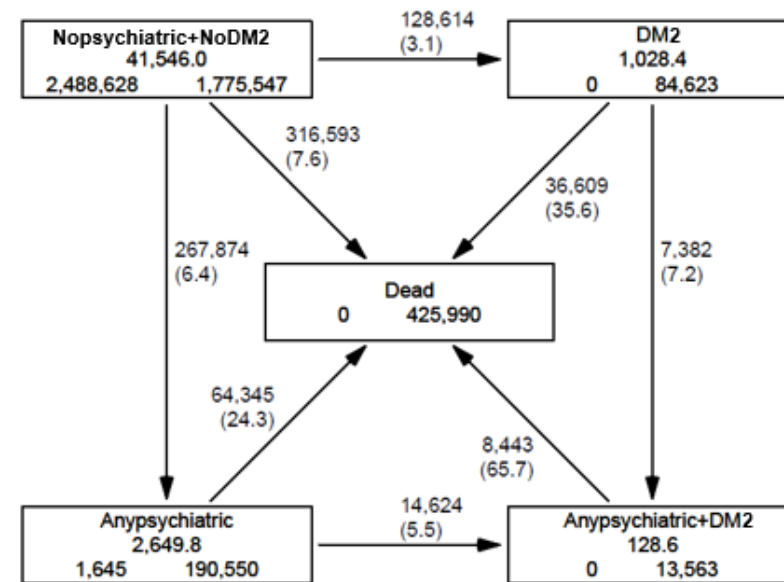

This multi-state model contains all women within the study sample

Multi-state models for any psychiatric disorder and type 2 diabetes. In these multi-state models, the individuals can be in five stages; 1) Nopsychiatric+NoDM2 (contains individuals not having any psychiatric disorder and not having type 2 diabetes), 2) Anypsychiatric (contains individuals with any psychiatric disorder), 3) DM (contains individuals with type 2 diabetes), 4) Anypsychiatric+DM (contains individuals with any psychiatric disorder and type 2 diabetes), and 5) Dead (contains individuals registered as dead). The numbers on the arrows are number of transitions and transitions per 1,000 person years of follow-up (overall IR). The number in the boxes are: Person years of follow-up (middle), the number of persons beginning in the state (bottom left), the number of persons ending their follow-up in the state (bottom right). The multi-state model to the left illustrates all men within the study sample whereas the multi-state model to the right contains all women from the study sample.

**Appendix 2.** Descriptive comparison of individuals with and without a psychiatric disorder ( $n = 5,005,612$ )

|                                                                     | Any<br>Psychiatric<br>disorder | Organic<br>disorders | Substance use<br>disorders | Schizophrenia    | Mood<br>disorders | Neurotic<br>disorders | Eating<br>disorders | Personality<br>disorders | Intellectual<br>disabilities | Developmental<br>disorders | Behavioral<br>disorders |
|---------------------------------------------------------------------|--------------------------------|----------------------|----------------------------|------------------|-------------------|-----------------------|---------------------|--------------------------|------------------------------|----------------------------|-------------------------|
| <b>Women</b>                                                        |                                |                      |                            |                  |                   |                       |                     |                          |                              |                            |                         |
| With psychiatric disorder,<br>%                                     | 55.51                          | 55.33                | 34.98                      | 46.90            | 61.23             | 59.26                 | 95.63               | 65.20                    | 47.52                        | 35.16                      | 44.63                   |
| Without psychiatric<br>disorder, %                                  | 49.09                          | 49.65                | 50.09                      | 49.79            | 49.27             | 49.26                 | 49.61               | 49.50                    | 49.75                        | 49.77                      | 49.78                   |
| <b>Age at entry to study</b>                                        |                                |                      |                            |                  |                   |                       |                     |                          |                              |                            |                         |
| With psychiatric disorder,<br>mean (SD)                             | 36.29<br>(17.81)               | 58.59<br>(13.99)     | 33.72<br>(13.84)           | 33.46<br>(15.73) | 35.44<br>(17.08)  | 29.80<br>(13.64)      | 20.73<br>(6.30)     | 26.92<br>(11.96)         | 31.35<br>(14.59)             | 20.89<br>(7.02)            | 20.39<br>(5.90)         |
| Without psychiatric<br>disorder, mean (SD)                          | 35.92<br>(17.10)               | 35.55<br>(16.96)     | 36.01<br>(17.24)           | 36.00<br>(17.19) | 35.98<br>(17.18)  | 36.28<br>(17.28)      | 36.01<br>(17.18)    | 36.11<br>(17.21)         | 35.97<br>(17.18)             | 35.98<br>(17.18)           | 36.04<br>(17.18)        |
| <b>Migration status: immigrant</b>                                  |                                |                      |                            |                  |                   |                       |                     |                          |                              |                            |                         |
| With psychiatric disorder,<br>%                                     | 5.59                           | 3.09                 | 4.54                       | 8.49             | 5.50              | 6.72                  | 3.48                | 4.00                     | 3.66                         | 1.99                       | 2.77                    |
| Without psychiatric<br>disorder, %                                  | 4.65                           | 4.77                 | 4.75                       | 4.69             | 4.71              | 4.64                  | 4.75                | 4.78                     | 4.75                         | 4.75                       | 4.75                    |
| <b>Education level at entry to study: lower secondary and below</b> |                                |                      |                            |                  |                   |                       |                     |                          |                              |                            |                         |
| With psychiatric disorder,<br>%                                     | 63.52                          | 59.52                | 62.6                       | 69.16            | 61.31             | 65.93                 | 83.21               | 73.87                    | 96.31                        | 91.78                      | 91.00                   |
| Without psychiatric<br>disorder, %                                  | 55.76                          | 56.50                | 56.42                      | 56.37            | 56.36             | 56.07                 | 56.47               | 56.28                    | 56.46                        | 56.50                      | 56.38                   |
| <b>Incident type 2 diabetes</b>                                     |                                |                      |                            |                  |                   |                       |                     |                          |                              |                            |                         |
| With psychiatric disorder,<br>%                                     | 8.58                           | 13.03                | 8.49                       | 10.65            | 9.20              | 7.52                  | 2.99                | 7.16                     | 10.05                        | 3.50                       | 2.97                    |
| Without psychiatric<br>disorder, %                                  | 6.47                           | 6.57                 | 6.45                       | 6.63             | 6.58              | 6.64                  | 6.70                | 6.68                     | 6.68                         | 6.69                       | 6.71                    |

SD: standard deviation.

“With psychiatric disorder” refer to individuals with the specific psychiatric disorder during study period. Whereas “without psychiatric disorder” refer to individuals without the specific psychiatric disorder during study period.

**Appendix 3.** Median and interquartile range of age of type 2 diabetes onset for individuals with and without a psychiatric disorder developing type 2 diabetes during the study period ( $N = 334,739$ )

| Psychiatric disorder      | With psychiatric disorder of interest |              | Without psychiatric disorder of interest |              |
|---------------------------|---------------------------------------|--------------|------------------------------------------|--------------|
|                           | <i>n</i>                              | Median (IQR) | <i>n</i>                                 | Median (IQR) |
| Any psychiatric disorder  |                                       |              |                                          |              |
| <i>Men</i>                | 21,620                                | 57.9 (19.5)  | 168,405                                  | 62.4 (16.2)  |
| <i>Women</i>              | 22,333                                | 60.1 (22.7)  | 122,381                                  | 64.3 (17.8)  |
| Organic disorders         |                                       |              |                                          |              |
| <i>Men</i>                | 5,649                                 | 69.6 (15.4)  | 184,376                                  | 61.8 (16.2)  |
| <i>Women</i>              | 5,820                                 | 73.2 (13.33) | 138,894                                  | 63.4 (18.5)  |
| Substance use disorders   |                                       |              |                                          |              |
| <i>Men</i>                | 6,033                                 | 54.2 (15.4)  | 183,992                                  | 62.2 (16.6)  |
| <i>Women</i>              | 3,472                                 | 56.1 (15.5)  | 140,909                                  | 64.0 (18.5)  |
| Schizophrenia             |                                       |              |                                          |              |
| <i>Men</i>                | 3,838                                 | 51.5 (17.1)  | 186,187                                  | 62.2 (16.6)  |
| <i>Women</i>              | 3,805                                 | 55.2 (19.6)  | 140,909                                  | 64.0 (18.4)  |
| Mood disorders            |                                       |              |                                          |              |
| <i>Men</i>                | 8,159                                 | 57.2 (18.0)  | 181,866                                  | 62.2 (16.6)  |
| <i>Women</i>              | 10,145                                | 58.6 (21.9)  | 134,569                                  | 64.2 (18.3)  |
| Neurotic disorders        |                                       |              |                                          |              |
| <i>Men</i>                | 8,492                                 | 52.9 (16.4)  | 181,533                                  | 62.4 (16.5)  |
| <i>Women</i>              | 9,868                                 | 53.7 (19.5)  | 134,846                                  | 64.4 (18.1)  |
| Eating disorders          |                                       |              |                                          |              |
| <i>Men</i>                | 43                                    | 42.1 (14.8)  | 189,982                                  | 62.0 (16.7)  |
| <i>Women</i>              | 424                                   | 40.6 (13.8)  | 144,290                                  | 63.9 (18.5)  |
| Personality disorders     |                                       |              |                                          |              |
| <i>Men</i>                | 2,198                                 | 49.7 (16.2)  | 187,827                                  | 62.1 (16.6)  |
| <i>Women</i>              | 3,492                                 | 49.4 (18.4)  | 141,222                                  | 64.1 (18.3)  |
| Intellectual disabilities |                                       |              |                                          |              |
| <i>Men</i>                | 559                                   | 50.1 (17.6)  | 189,466                                  | 62.0 (16.7)  |
| <i>Women</i>              | 599                                   | 50.9 (19.4)  | 144,115                                  | 63.9 (18.5)  |
| Developmental disorders   |                                       |              |                                          |              |
| <i>Men</i>                | 193                                   | 40.3 (17.0)  | 189,832                                  | 62.0 (16.7)  |
| <i>Women</i>              | 74                                    | 40.1 (15.2)  | 144,640                                  | 63.8 (18.6)  |
| Behavioral disorders      |                                       |              |                                          |              |
| <i>Men</i>                | 415                                   | 42.1 (15.1)  | 189,610                                  | 62.0 (16.7)  |
| <i>Women</i>              | 327                                   | 41.1 (14.4)  | 144,387                                  | 63.9 (18.5)  |

IQR, interquartile range
